# Supplementary figures and images for: Reorganization of postmitotic neuronal chromatin accessibility for maturation of serotonergic identity
Source: eLife journal article supplement (doi:10.7554/elife.75970), 2022-04-26

Figure 7 - figure supplement 1

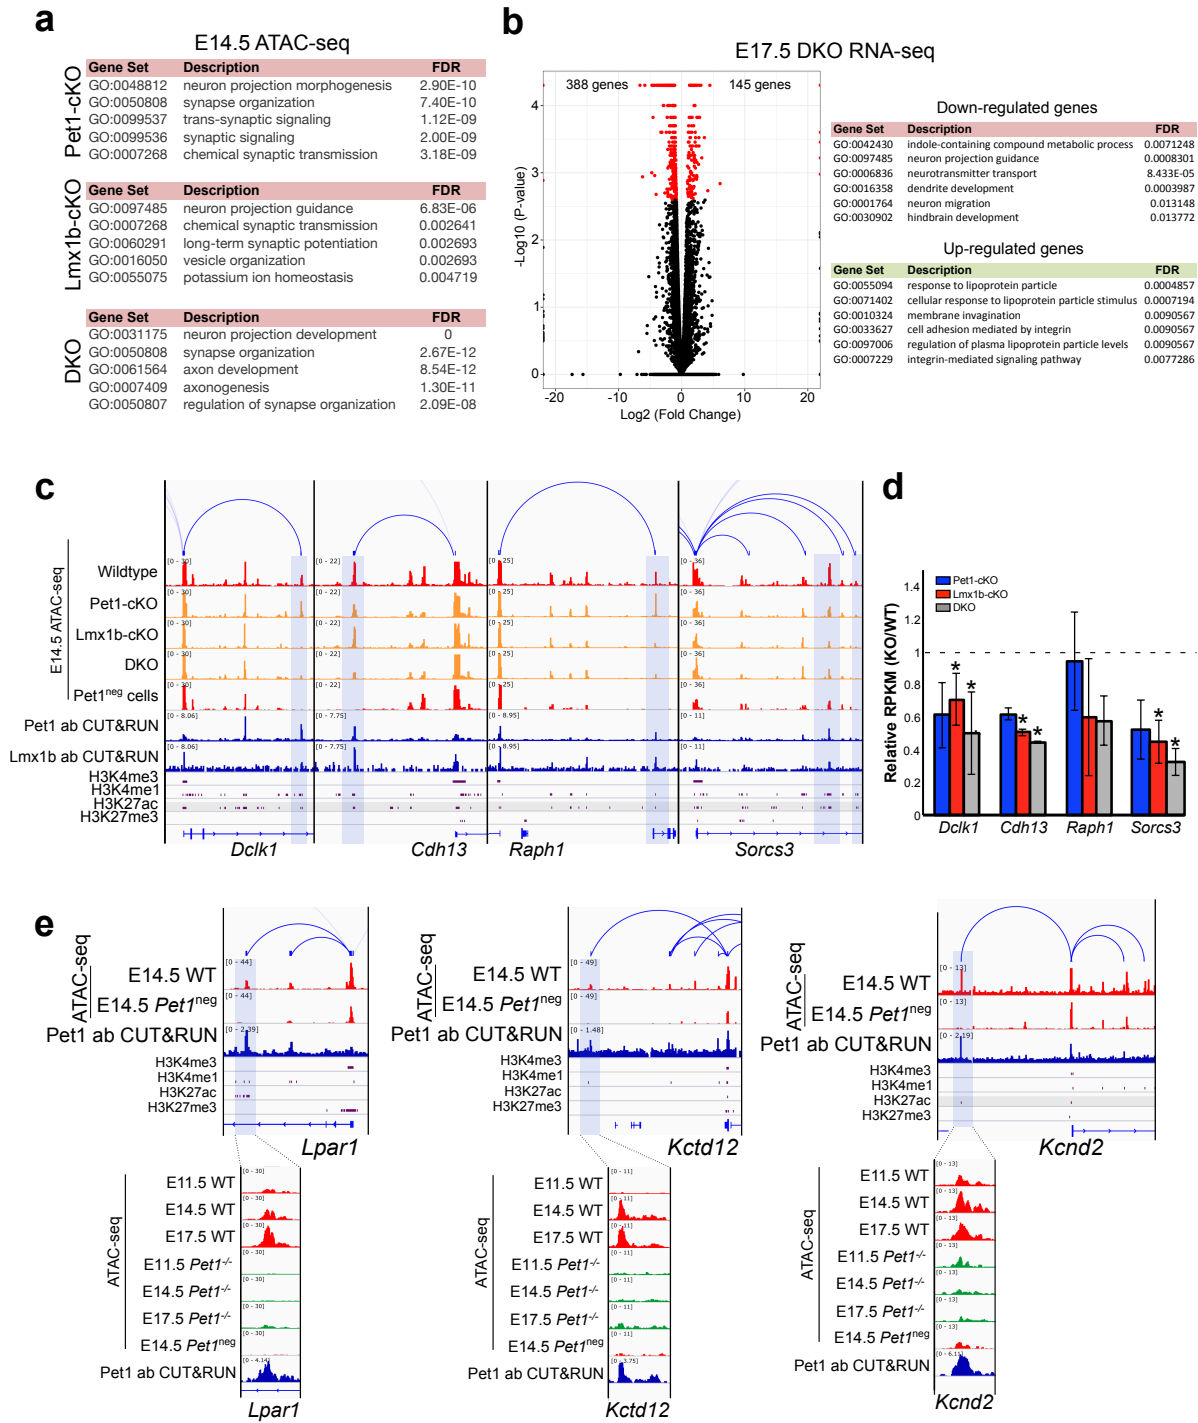

Supplement: supp [file elife-75970-supp-v1.zip]

**Figure 2- figure supplement 1**

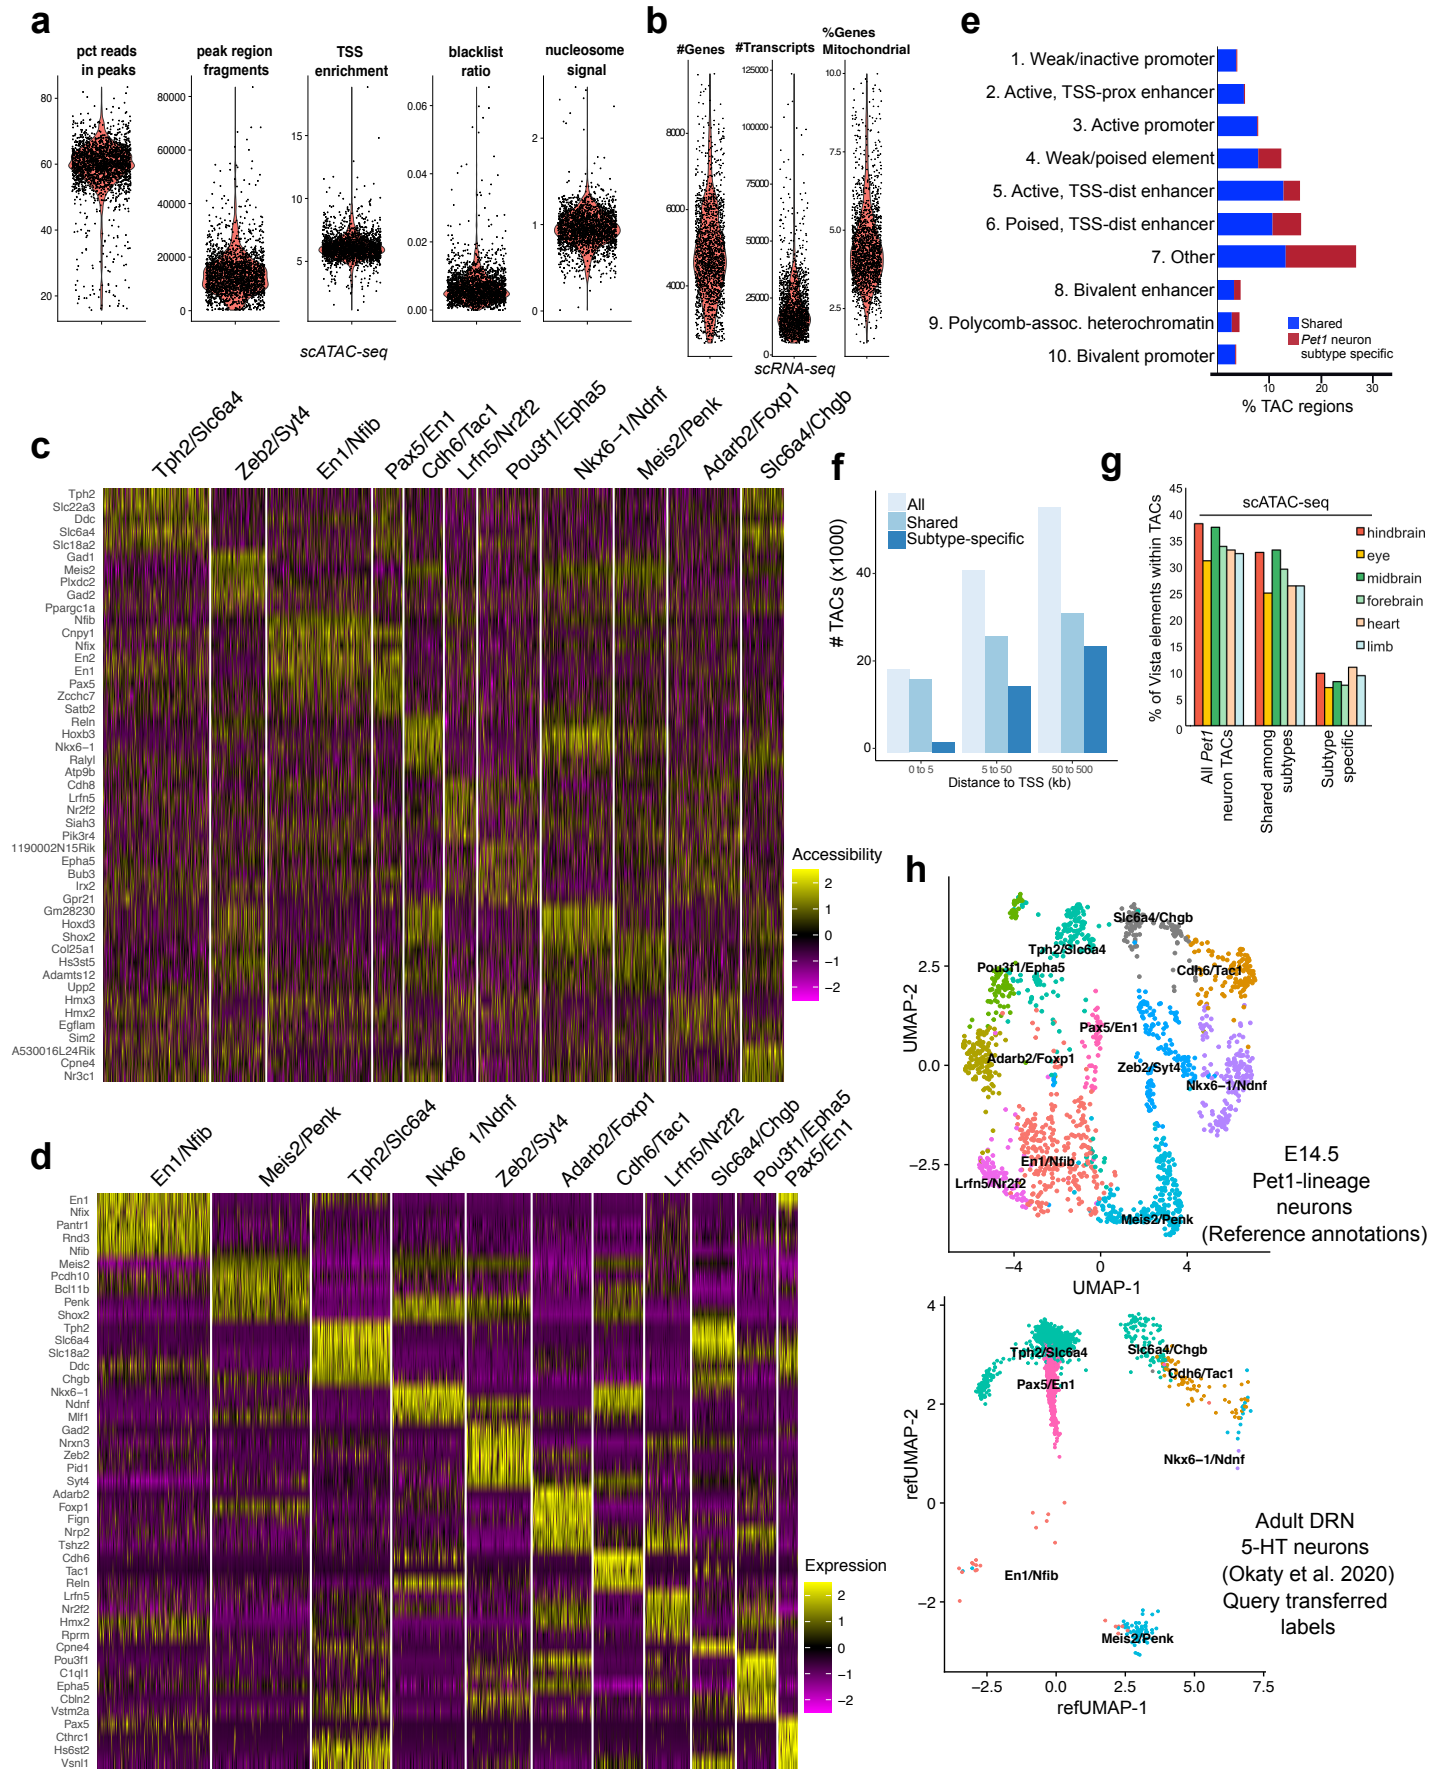

Supplement: supp [file elife-75970-supp-v1.zip]

**Figure 1- figure supplement 1**

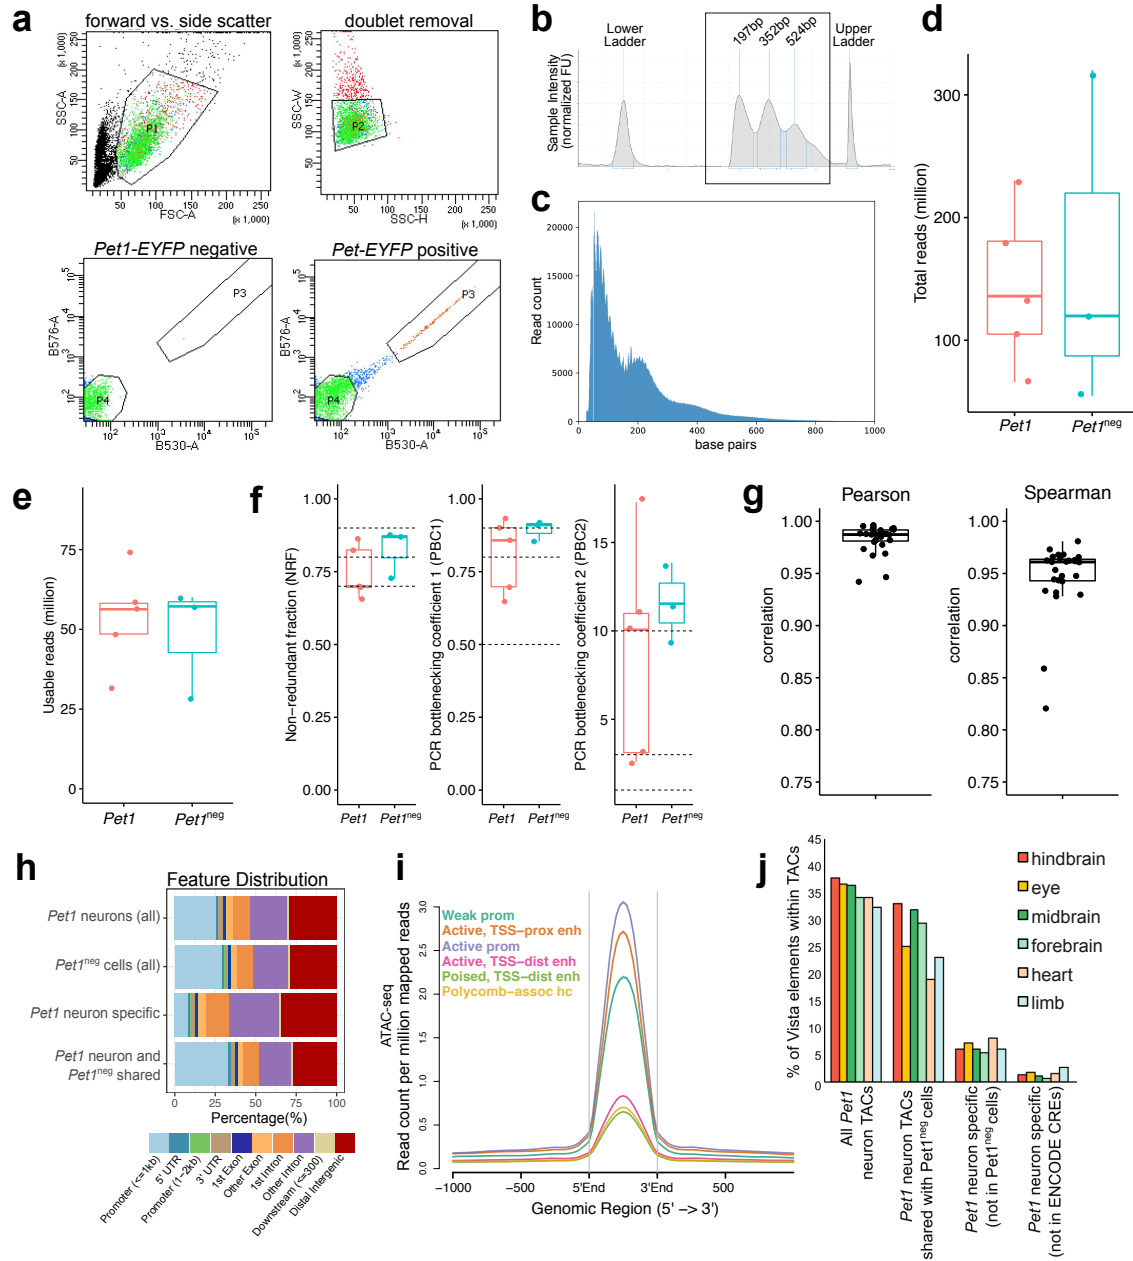

Supplement: supp [file elife-75970-supp-v1.zip]

**Figure 4 - figure supplement 1**

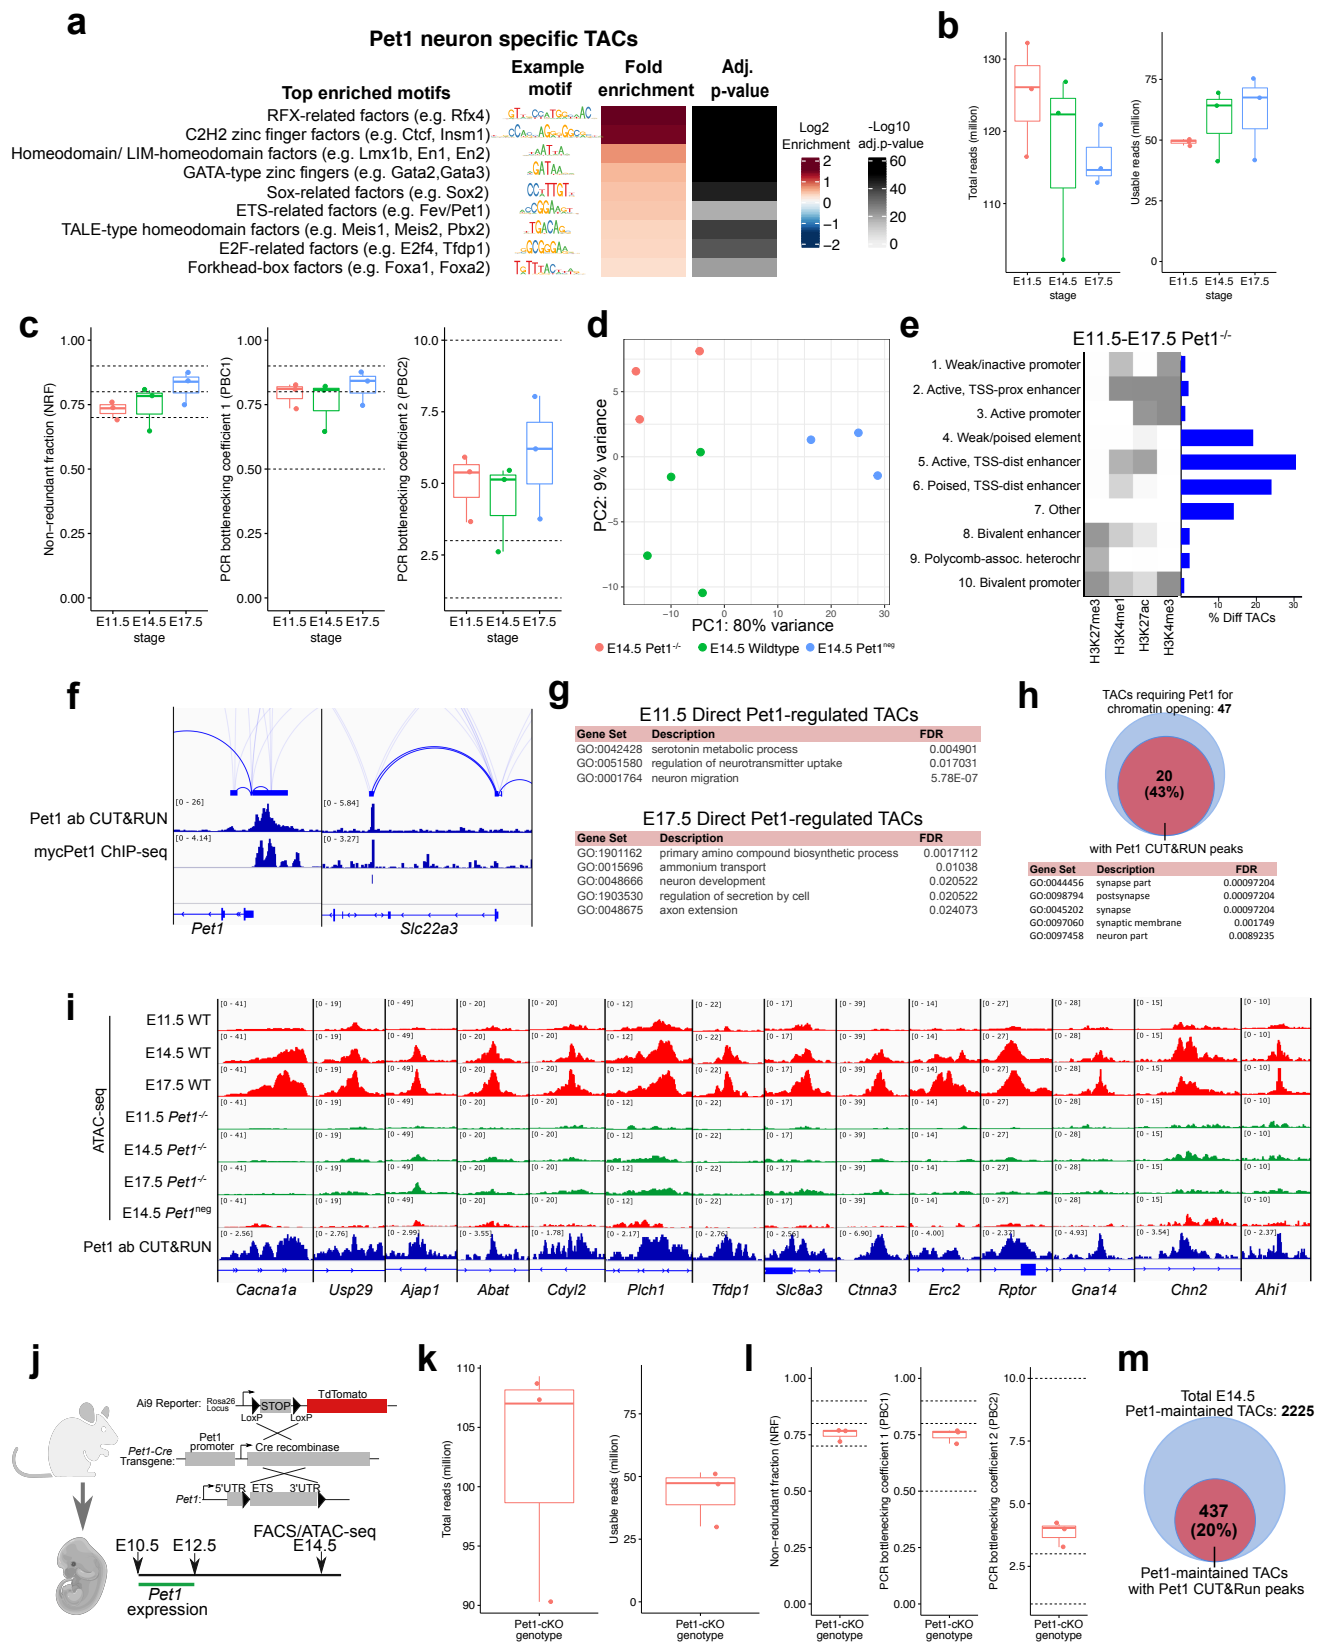

Supplement: supp [file elife-75970-supp-v1.zip]

**Figure 6 - figure supplement 1**

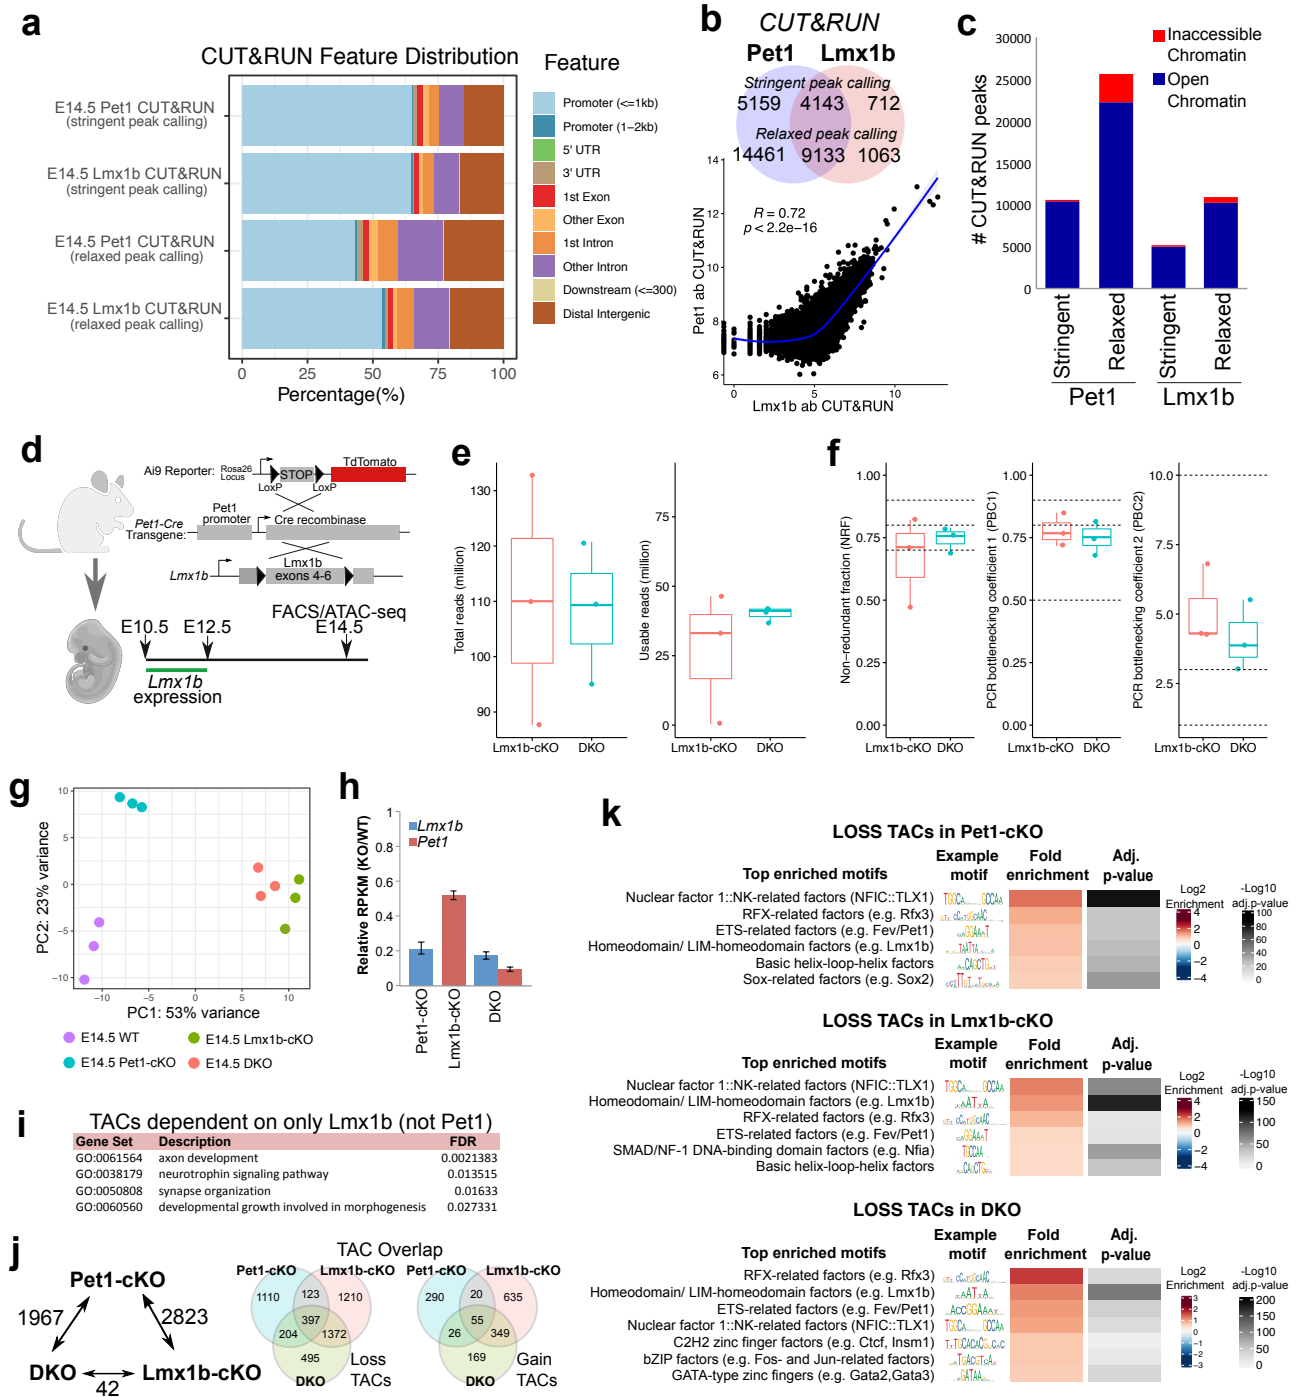

Supplement: supp [file elife-75970-supp-v1.zip]

**Figure 3 - figure supplement 1**

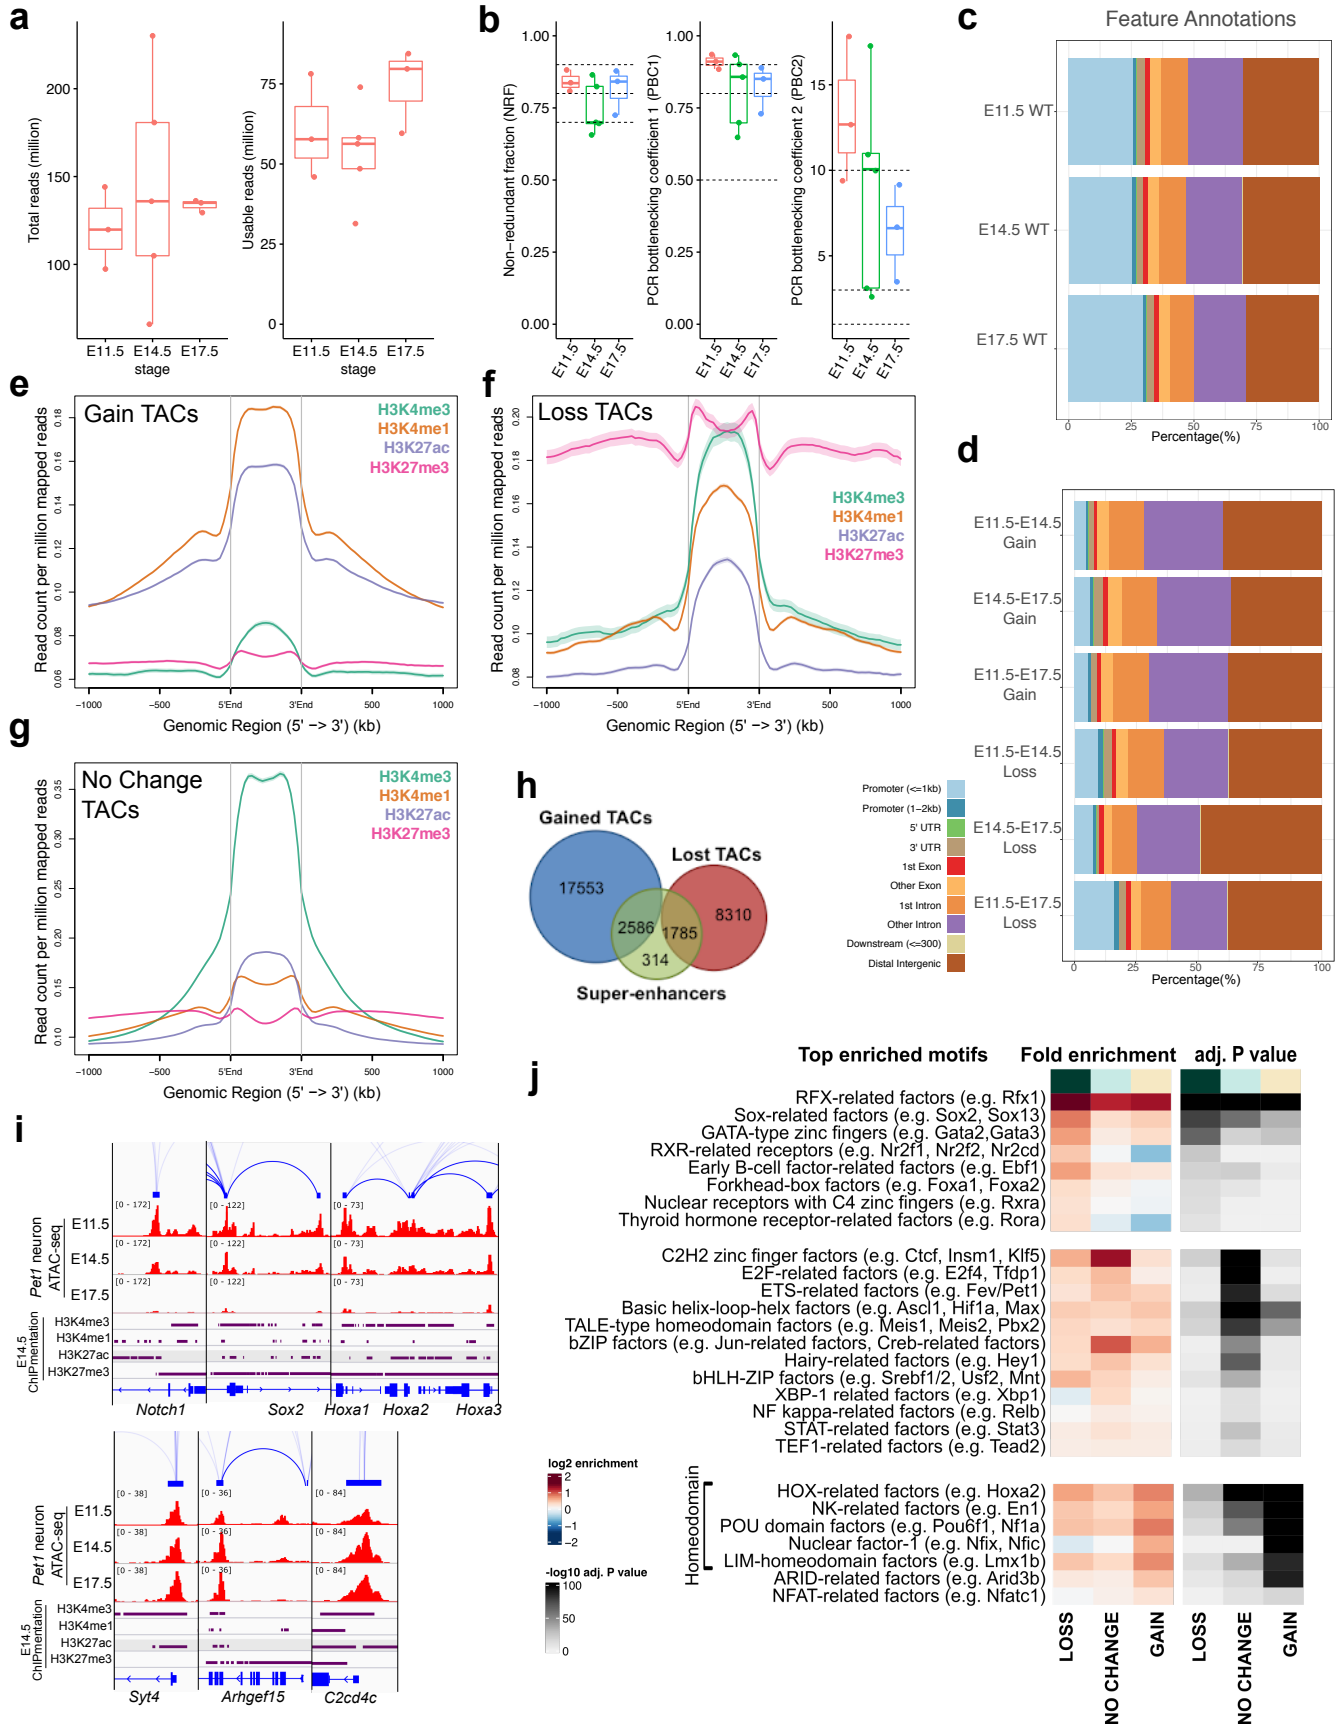

Supplement: supp [file elife-75970-supp-v1.zip]
